# Supplementary material for: HLA-DP84Gly constitutively presents endogenous peptides generated by the class I antigen processing pathway
Source: PubMed Central journal article supplement (PMC5436232; doi:10.1038/ncomms15244), 2017-05-10
Supplement: ncomms15244-s1.pdf [file ncomms15244-s1.pdf]

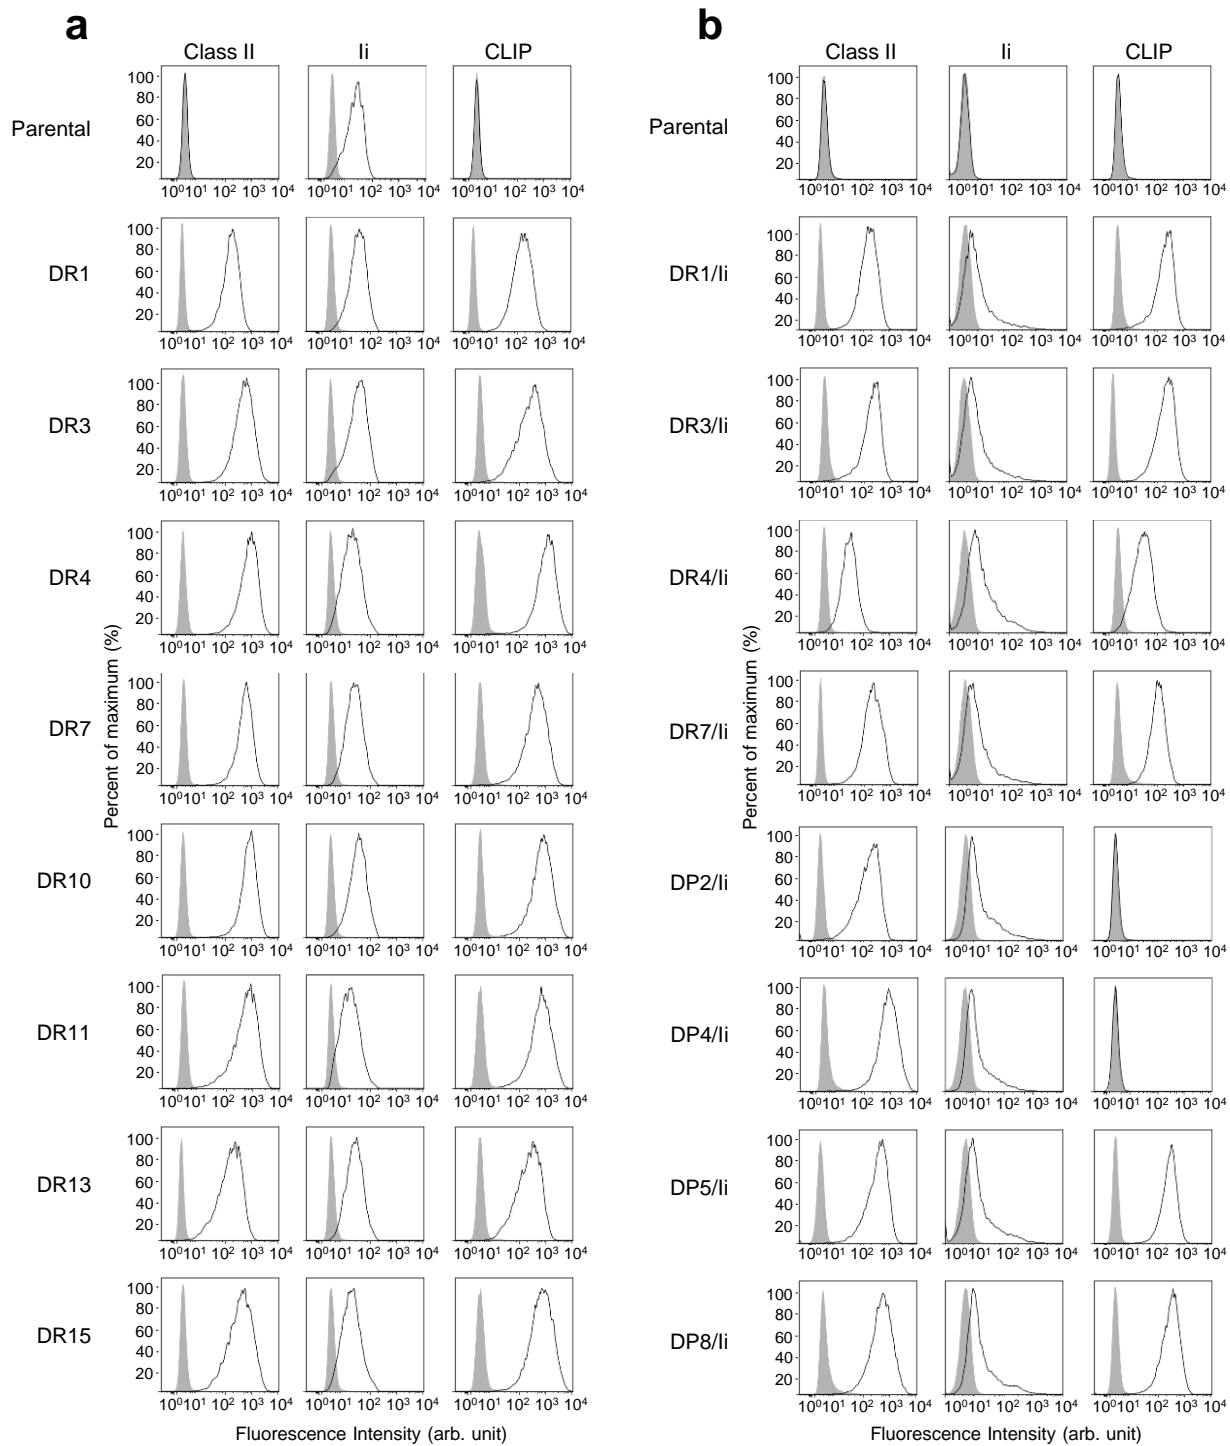

**Supplementary Figure 1** DP5, DP8, and all HLA-DR alleles tested, but not DP2 or DP4, present CLIP on the cell surface. **(a)** T2 cells were stably transfected with *DRA1\*0101* (*DRA1*) along with *DRB1\*0101* (*DRB1*), *DRB1\*0103* (*DRB3*), *DRB1\*0401* (*DRB4*), *DRB1\*0701* (*DRB7*), *DRB1\*1001* (*DRB10*), *DRB1\*1101* (*DRB11*), *DRB1\*1301* (*DRB13*) or *DRB1\*1501* (*DRB15*). Surface expression of class II, Ii, and CLIP on these T2 transfectants and parental T2 cells was analyzed by flow cytometry following staining with specific mAbs. **(b)** K562 cells were stably transfected with both Ii and *DRA1* along with *DRB1*, *DRB3*, *DRB4* or *DRB7*. K562 cells were stably infected with both Ii and *DPA1* in conjunction with *DPB2* (*DP2*), *DPB4* (*DP4*), *DPB5* (*DP5*) or *DPB8* (*DP8*). Surface expression of class II, Ii, and CLIP on the K562 transfectants and parental K562 were analyzed by flow cytometry after staining with specific mAbs.

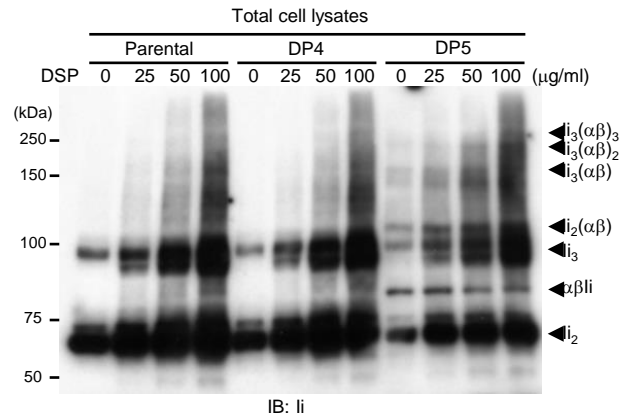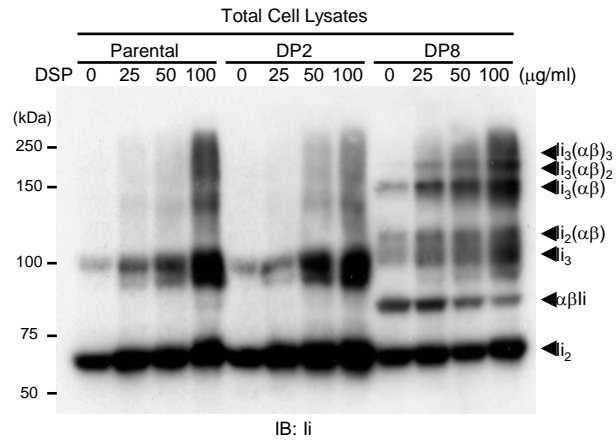

**Supplementary Figure 2** DP<sup>84DEAV87</sup> but not DP<sup>84GGPM87</sup> forms multimers with endogenous Ii. T2 transfectants stably expressing DP<sup>84DEAV87</sup> (DP5 or DP8) or DP<sup>84GGPM87</sup> (DP2 and DP4) and parental T2 were treated by DSP at the indicated concentrations for 2 hrs. Non-reduced samples were immunoblotted with anti-Ii mAb.

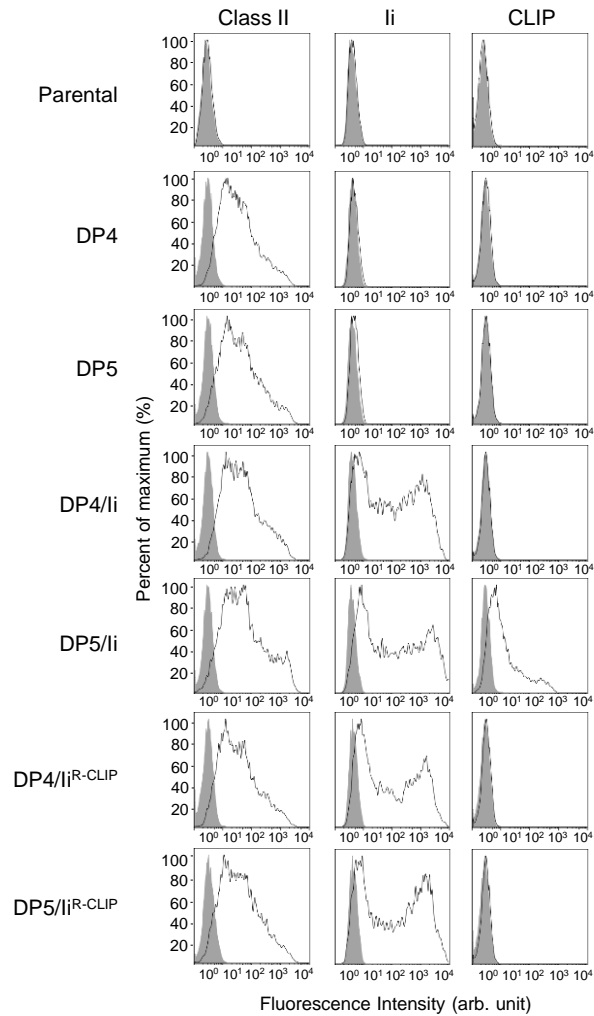

### Supplementary Figure 3

Surface expression of Class II, Ii, and CLIP on HEK293 transiently transfected with *DPA1\*01:03* in conjunction with either *DPB1\*04:01* (DP4) or *DPB1\*05:01* (DP5) and one of *Ii* or *Ii<sup>R-CLIP</sup>* as indicated. Expression of Class II, Ii, and CLIP on HEK293 transfectants and parental HEK293 were analyzed by flow cytometry following staining with specific mAbs.

**a**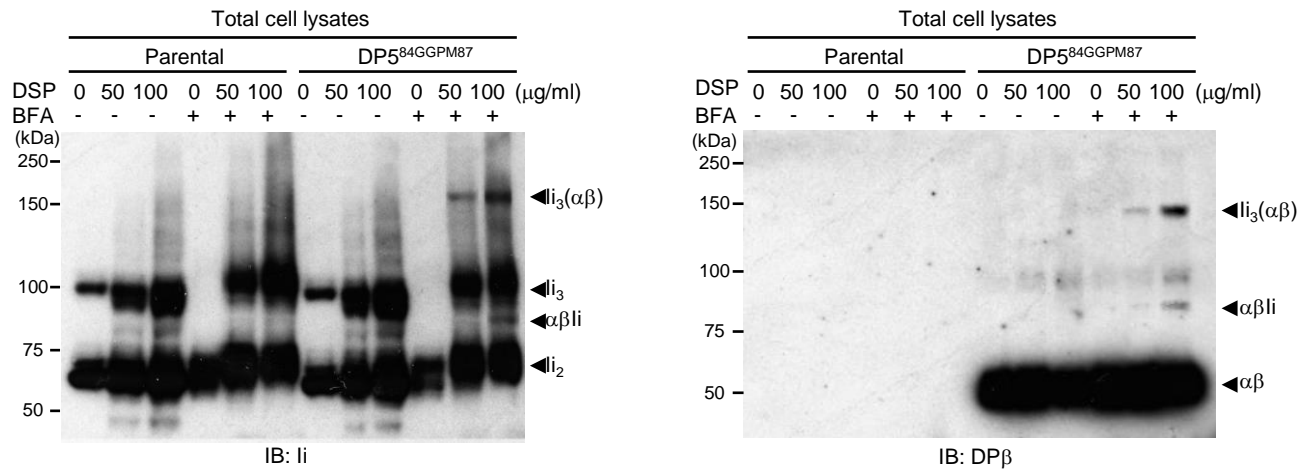**b**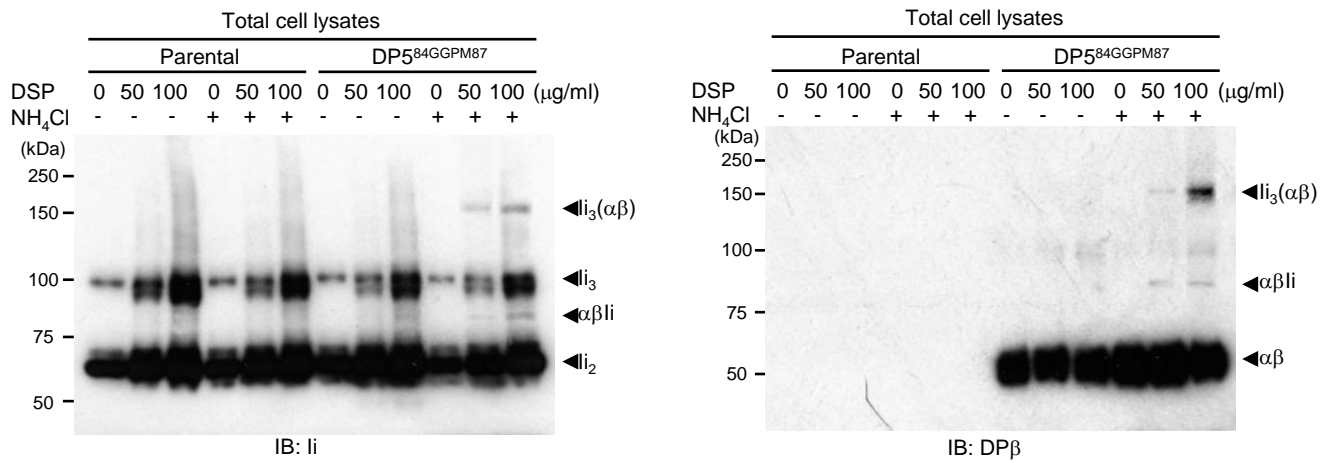

**Supplementary Figure 4** DP5<sup>84GGPM87</sup> associates with Ii in neutral pH conditions. **(a,b)** T2 and mutant T2/DP5<sup>84GGPM87</sup> cells were cultured in the presence or absence of 10 mg/ml BFA **(a)** or 40 mM ammonium chloride (NH<sub>4</sub>Cl) **(b)**. The cells were further treated by DSP at the indicated concentrations for 2 hrs. Non-reduced samples were immunoblotted with anti-Ii or DPβ mAb.

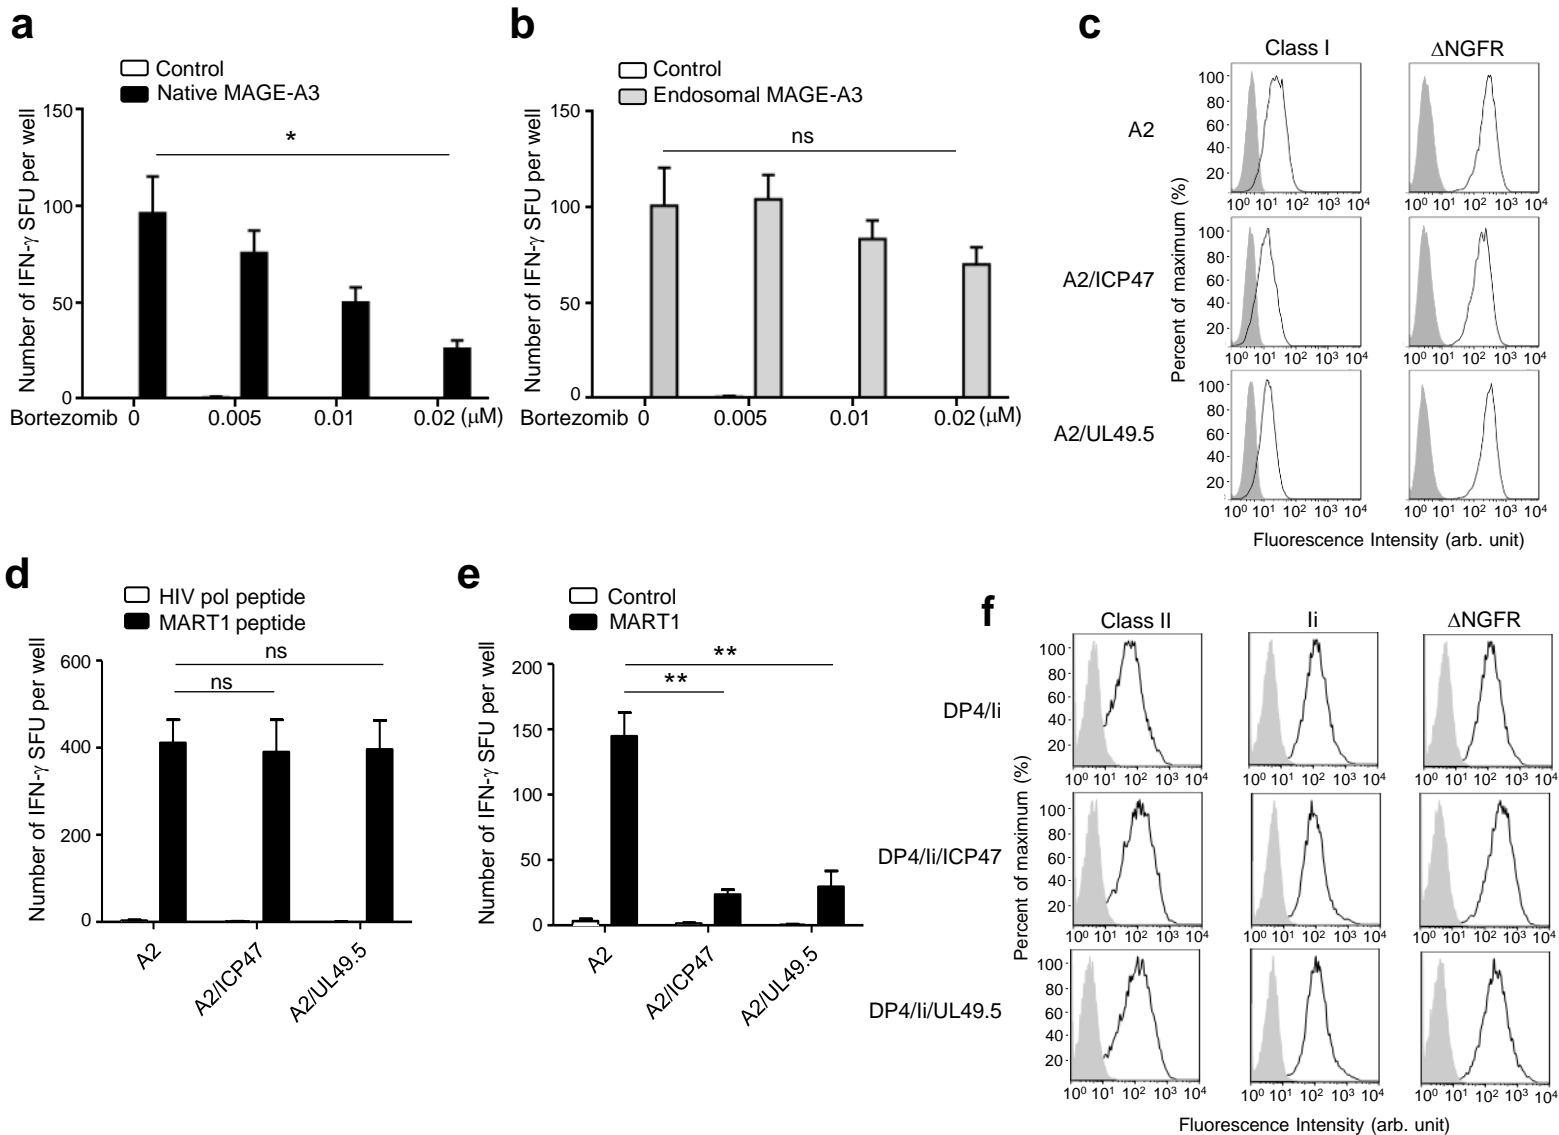

**Supplementary Figure 5** Role of the proteasome and TAP molecules in the processing and presentation of DP4-restricted peptides. **(a,b)** K562/DP4/li cells were transiently transfected with a retrovirus vector encoding IRES-EGFP (control) or a native **(a)** or endosome-targeted **(b)** form of MAGE-A3 linked with IRES-EGFP. The cells were cultured with bortezomib at the indicated concentrations for 48 hrs. Transient transfection efficiencies were normalized to EGFP expression measured by flow cytometry. Data shown represent means  $\pm$  SDs of triplicates. **(c)** K562/A2 were stably transfected with a retrovirus vector encoding IRES- $\Delta\text{NGFR}$  (control), or ICP47 or UL49.5 linked with IRES- $\Delta\text{NGFR}$ .  $\Delta\text{NGFR}$  transduced cells were isolated using anti-NGFR mAb. Surface expression of class I and  $\Delta\text{NGFR}$  (ICP47 or UL49.5) was analyzed by flow cytometry after staining with specific mAbs. **(d)** A2/MART1<sub>27-35</sub> T cells were stimulated with the K562-based aAPCs pulsed with A2-restricted HIV pol<sub>476-484</sub> (control) or MART1<sub>27-35</sub> peptide, and IFN- $\gamma$  secretion was evaluated by ELISPOT assays. Data shown represent means  $\pm$  SDs of triplicates. **(e)** The indicated K562 aAPCs were transiently transfected with a retrovirus vector encoding IRES-EGFP (control) or full-length MART1 gene linked with IRES-EGFP. Transient transfection efficiencies were normalized to EGFP expression measured by flow cytometry. A2/MART1<sub>27-35</sub> T cells were stimulated with the indicated aAPCs and IFN- $\gamma$  secretion was measured by ELISPOT analysis. Data shown represent means  $\pm$  SDs of triplicates. Results are representative of three independent experiments. ns, not significant; \* $p < 0.05$ , \*\* $p < 0.01$  by unpaired, two-tailed Welch's  $t$  test. **(f)** K562/DP4/li cells were stably transfected with a retrovirus vector encoding IRES- $\Delta\text{NGFR}$  (control), or ICP47 or UL49.5 linked with IRES- $\Delta\text{NGFR}$ .  $\Delta\text{NGFR}$  transduced cells were isolated using anti-NGFR mAb. Surface expression of class II and  $\Delta\text{NGFR}$  (ICP47 or UL49.5), as well as intracellular expression of li, were analyzed by flow cytometry after staining with specific mAbs.

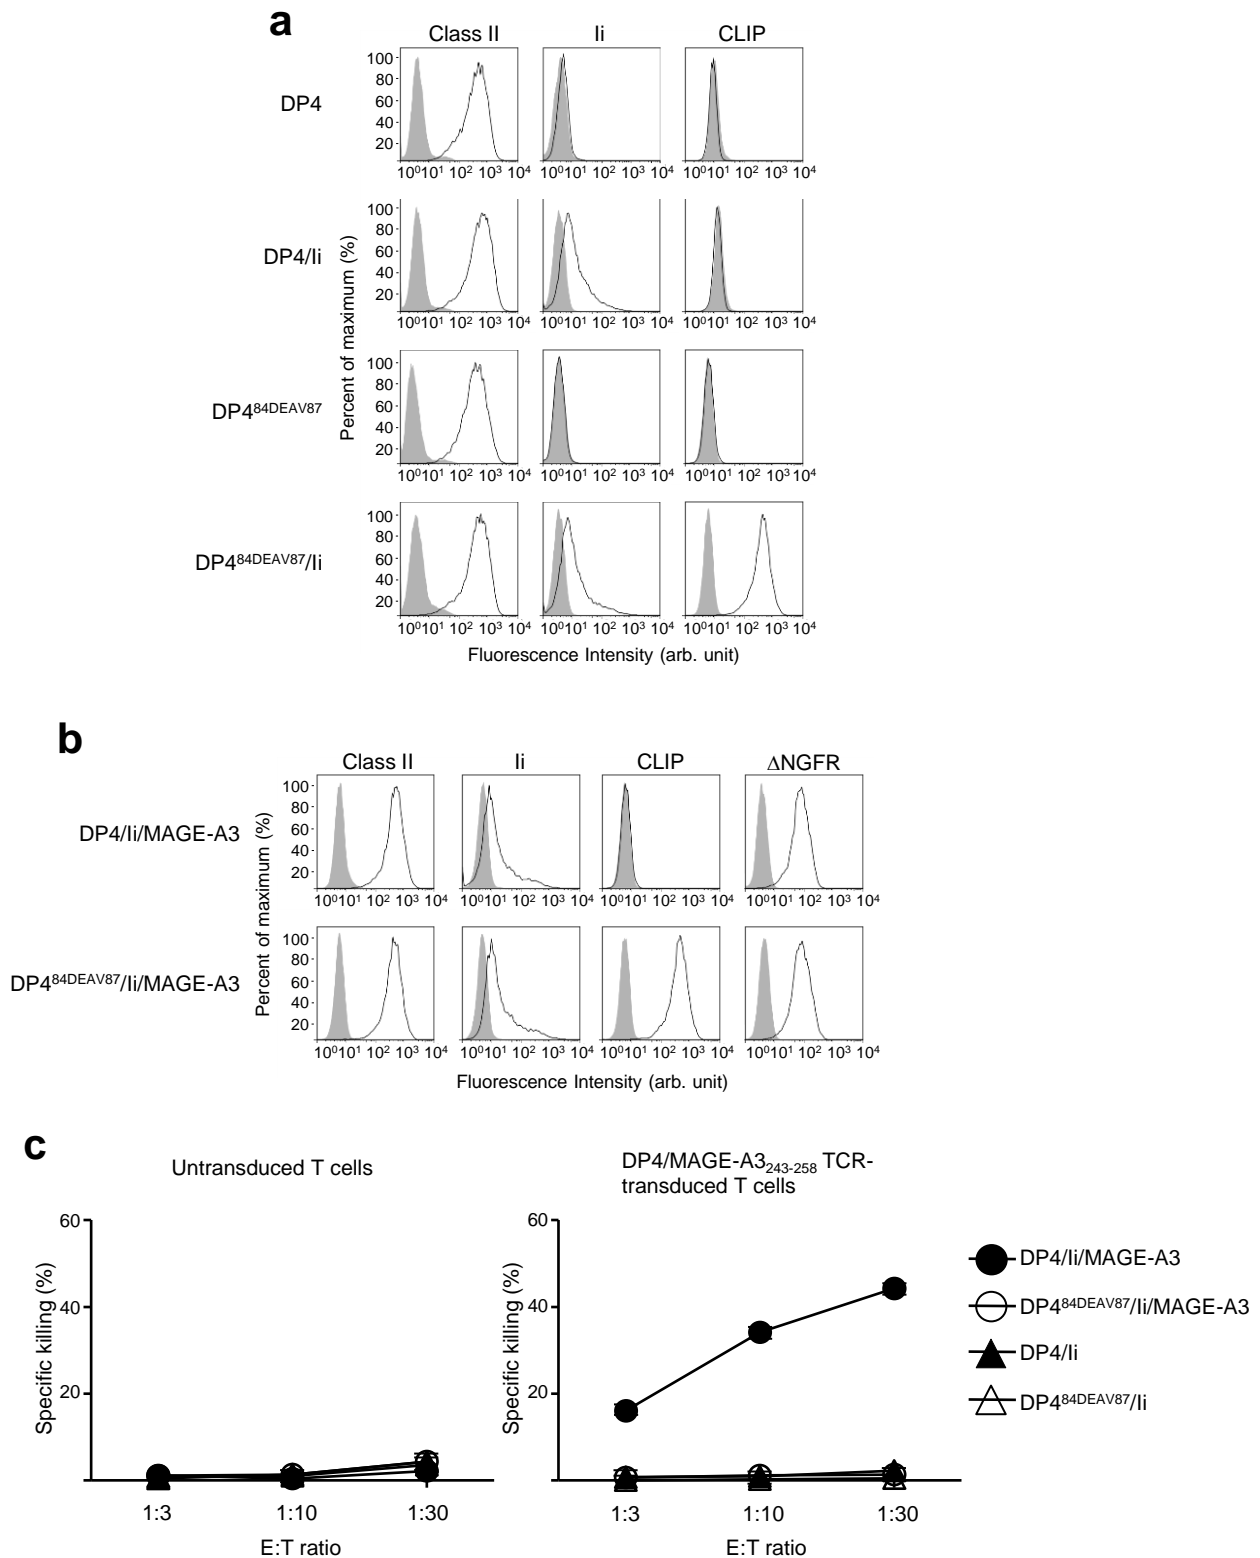

**Supplementary Figure 6** DP<sup>84GGPM87</sup> constitutively presents endogenous peptides even in the presence of Ii and can be targeted by antigen-specific T cells. (a) K562 cells expressing DP4 or DP4<sup>84DEAV87</sup> were stably transduced with Ii. Surface expression of class II, Ii, and CLIP were studied by flow cytometry following staining with specific mAbs. (b) A native form of MAGE-A3 was fused with  $\Delta$ NGFR as a cell-surface marker for tracking and sorting of transduced cells.  $\Delta$ NGFR (MAGE-A3)-transduced cells were isolated using anti-NGFR mAb. Surface expression of class II, Ii, CLIP, and  $\Delta$ NGFR (MAGE-A3) is depicted. (c) CD8<sup>+</sup> T cells transduced with or without DP4/MAGE-A3<sub>243-258</sub> TCR were coincubated with K562 cells stably expressing the indicated genes at various effector/target ratios. Cytotoxicity was assessed by a standard <sup>51</sup>Cr release assay. The results are presented as the means  $\pm$  SDs of triplicates.

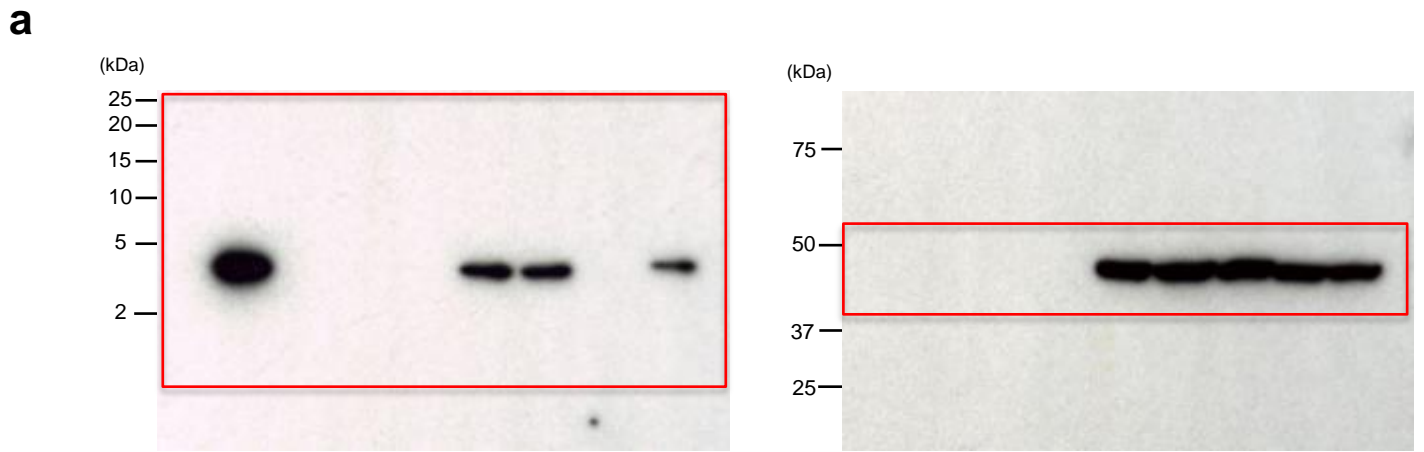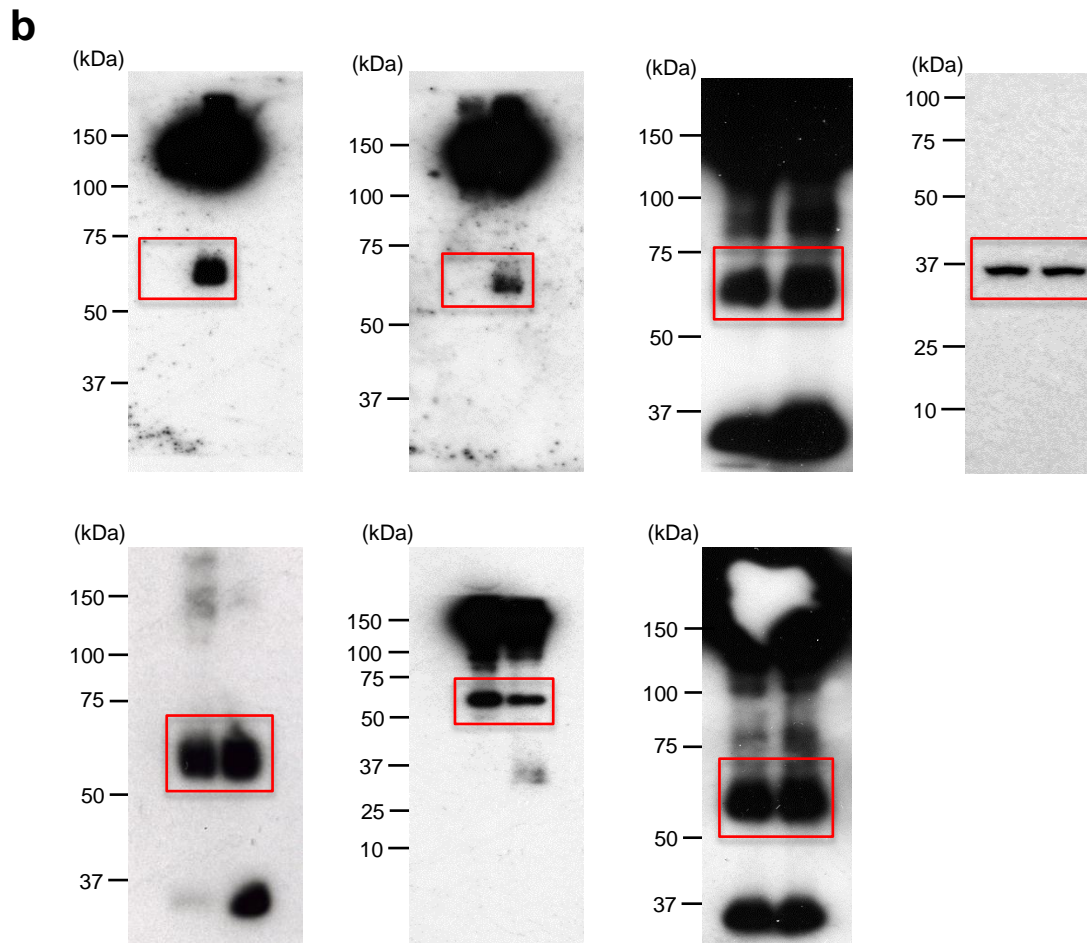

**Supplementary Figure 7:** Uncropped western blotting images from Figures 2a (**a**) and 2c (**b**). Outlined regions represent portion of each image displayed in main figures.

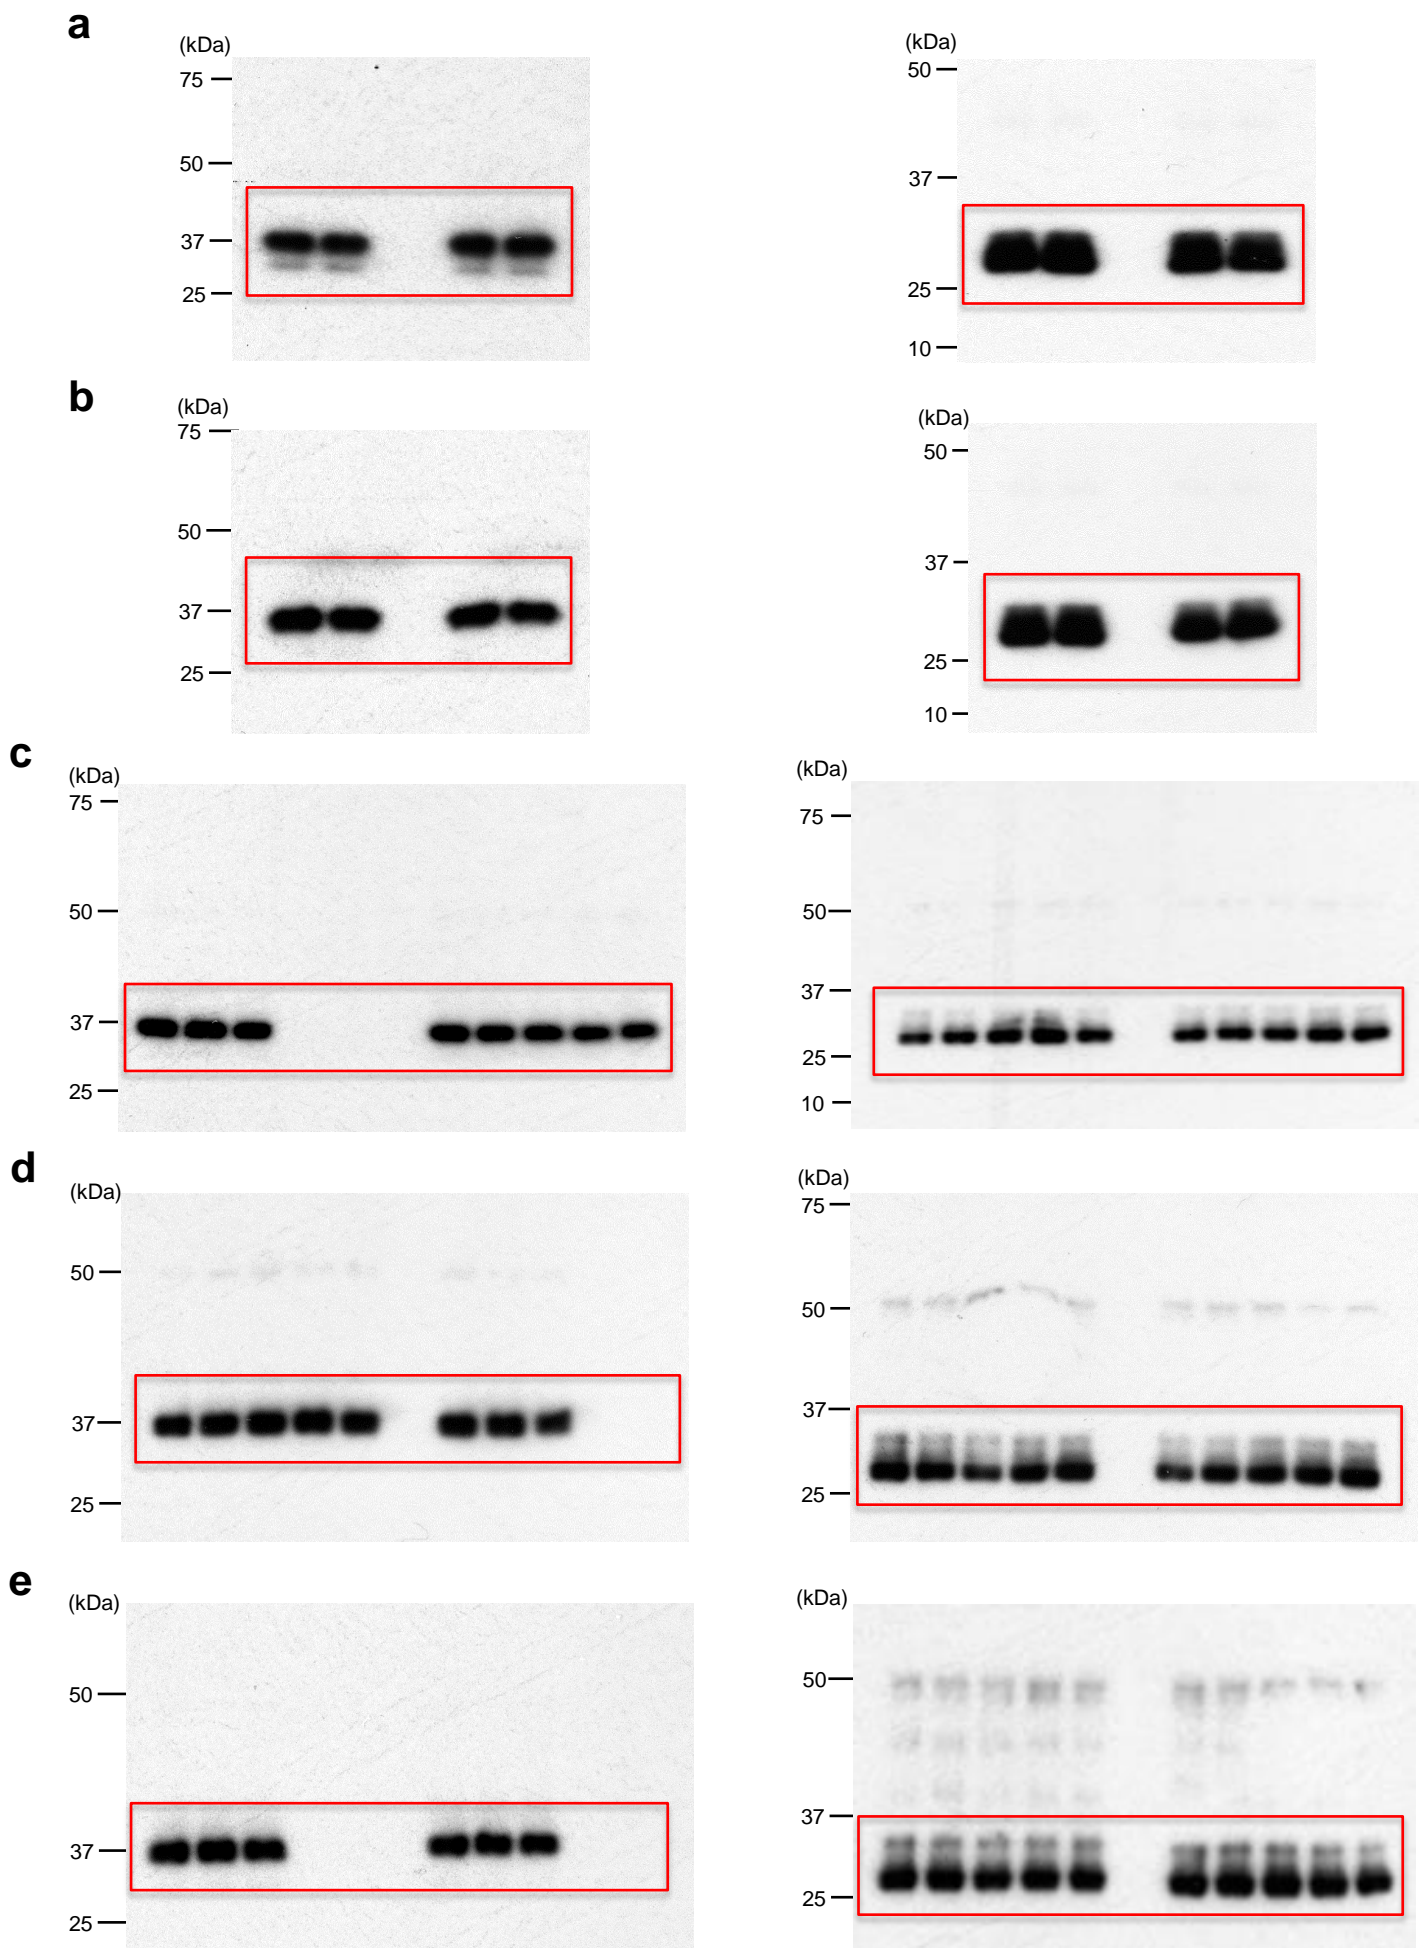

**Supplementary Figure 8:** Uncropped western blotting images from Figure 5a (a), 5b (b), 5c (c), 5d (d), and 5e (e). Outlined regions represent portion of each image displayed in main figures.



| DP4/4 EBV-LCL |                       |       |            | DP5/17 EBV-LCL |                      |       |            |
|---------------|-----------------------|-------|------------|----------------|----------------------|-------|------------|
| Gene names    | Peptide sequence      | m/z   | Intensity  | Gene names     | Peptide sequence     | m/z   | Intensity  |
| ABHD3         | SSVNHKRMHFVKQVDM      | 647.3 | 409,650    | ACAT1          | DAAKRLNVTPLARIV      | 409.0 | 264,330    |
| ARH2          | MSVDNMQSGDSNEEDY      | 635.6 | 248,600    | ACTB           | DDDIAAALVVD          | 522.2 | 4,124,800  |
| ATP13A2       | SVLALLGTIYSIFIL       | 405.5 | 3,023,500  | APOB           | LKTKTNSEEFAAAMS      | 826.9 | 10,240,000 |
| ATP5B         | PLDSTSRIMD            | 566.8 | 3,045,000  | <b>ATP5B</b>   | PLDSTSRIMD           | 783.4 | 5,346,000  |
| B2M           | TPKIQVYSRHPAEN        | 546.3 | 1,975,500  | ATP5H          | AGRKLALKTID          | 566.8 | 2,003,400  |
| BRP44L        | AGALVRAAD             | 485.3 | 2,573,200  | ATP5J          | PKFVEIEKPQA          | 394.9 | 1,554,200  |
| BST2          | AQGQKVELEGEIT         | 828.9 | 305,170    | <b>BRP44L</b>  | AGALVRAAD            | 642.4 | 3,758,000  |
| CACNA1D       | MMMMMMKFMQHQHQ        | 666.6 | 556,700    | BST2           | VERLRRENQVLSVR       | 485.3 | 1,253,100  |
| CCRL1         | MALEQNQSTDYIEE        | 941.4 | 786,110    |                | AQGQKVELEGE          | 438.3 | 6,134,100  |
| CLMP          | MSLLLLLLLVSY          | 458.9 | 2,015,800  |                | LDKLTVTSQNLQ         | 721.9 | 2,483,400  |
| CMTM6         | MENGAVYSPTEED         | 770.8 | 1,183,100  |                | GRLLKLTVTSQLQ        | 679.4 | 11,526,000 |
| COX5A         | SHGSQETDEEFD          | 689.8 | 118,320    | CD74           | PSSGLGVTKQDLGVFPM    | 785.9 | 10,530,000 |
| COX5B         | PYNVLAPKASGTRED       | 557.9 | 7,623,200  |                | <b>SKMRMATPLLMQ</b>  | 840.9 | 1,899,600  |
| CTSH          | LPSQAFEYILNKG         | 547.3 | 1,193,000  | COX5B          | PYNVLAPKASGTRED      | 702.9 | 1,968,300  |
| DCAF15        | MLNMMMSDENHRD         | 628.2 | 221,030    | ENTPD2         | MAGKVRSLLPPLLLAAA    | 557.9 | 3,672,200  |
| EPRS          | ATLSLTVNSGD           | 538.3 | 2,402,700  | EPRS           | ATLSLTVNSGD          | 430.0 | 10,653,000 |
| ERV3-1        | DQWPEARELMP           | 518.9 | 163,690    | FARSA          | AEPRPPTQEA           | 538.3 | 3,070,300  |
| FRRS1L        | MRRPRQGGG             | 506.8 | 1,548,300  | FCER2          | KGKTKQVWHARYA        | 631.3 | 1,542,100  |
| GEMIN2        | RRAELAGLK             | 506.3 | 251,100    | GALNT2         | TPEQRSSRQGNFVAPI     | 481.3 | 15,359,000 |
| HLA-A,B,C     | EPRFISVGVVDDTQ        | 812.4 | 1,460,900  | GAPDH          | RHQVVSDFNSDTHS       | 500.3 | 8,773,200  |
| HLA-DPB1      | SPVTVEWKAQ            | 571.8 | 14,912,000 | HLA-A          | EFRLRHQYAYDGKD       | 601.7 | 8,845,800  |
| IFITM1,2,3    | VGDTVGAQAYASTAK       | 672.8 | 2,695,800  | HLA-A,B,C      | EPRFISVGVVDDTQ       | 562.6 | 5,033,600  |
|               | TPSKQSNKYYAASSYLSLTP  | 718.7 | 2,549,300  |                | GRLLRGHNQYAYDGKD     | 472.0 | 10,893,000 |
|               | <b>SNKYAASSYLSLTP</b> | 871.9 | 11,970,000 |                | GRLLRGHNQYAYDGKDY    | 804.4 | 935,560    |
|               | <b>NNKYAASSYLSLTP</b> | 871.9 | 11,970,000 |                | GRLLRGHNQYAYDGKDY    | 620.6 | 27,976,000 |
|               | <b>NNKYAASSYLSLTP</b> | 828.4 | 8,742,100  |                | GRLLRGHNQYAYDGKDY    | 506.2 | 8,254,300  |
|               | <b>NNKYAASSYLSLTP</b> | 763.9 | 3,323,900  |                | GRLLRGHNQYAYDGKDY    | 436.7 | 2,972,500  |
|               | <b>NNKYAASSYLSLTP</b> | 807.4 | 3,290,900  |                | GRLLRGHNQYAYDGKDY    | 492.0 | 1,532,100  |
|               | <b>NNKYAASSYLSLTP</b> | 715.4 | 2,271,400  |                | GRLLRGHNQYAYDGKDY    | 549.6 | 1,814,800  |
|               | <b>NKYAASSYLSLTP</b>  | 771.4 | 1,613,100  |                | YDGKDYIALNEDLSS      | 850.9 | 5,705,000  |
| KARS          | AAVQAAEVKVD           | 549.8 | 1,389,600  |                | YDGKDYIALNEDLSS      | 807.4 | 2,407,600  |
| MT1B          | MDPNCSCCTGGSCACA      | 506.5 | 3,192,300  |                | GKDYIALNEDLSS        | 711.8 | 1,117,500  |
| NDUFB11       | PSKIQLEPEDE           | 577.3 | 4,704,200  | HLA-DPA1       | PPEVTVFFPKE          | 570.8 | 2,703,400  |
| NDUFS8        | TYKYVNMQD             | 580.3 | 835,150    | HLA-DPB1       | SPVTVEWKAQ           | 507.8 | 6,595,100  |
| NDUFV2        | GAGGALFVHRD           | 549.3 | 2,894,700  |                | SPVTVEWKAQSD         | 571.8 | 5,533,100  |
| NMNAT3        | MKSRIPVVLL            | 384.9 | 556,190    |                | SPVTVEWKAQSDS        | 672.8 | 1,591,800  |
| NPIPL1,2      | MRLRFWLLIWL           | 590.7 | 294,990    |                | YDGKDYIALNEDL        | 716.3 | 867,170    |
| ORD21         | LSLIDMMYISTI          | 699.4 | 2,271,400  | HLA-G          | DGKDYIALNEDLR        | 707.3 | 2,625,100  |
| PCDH19        | ESLLLPVLLLLIAI        | 703.0 | 961,180    | HMGCRC         | MIEVNNKLNKLVGSAM     | 506.9 | 2,031,000  |
| PGAM1,4       | VPQIKEGKRVLIAAHG      | 571.7 | 1,015,600  | HNRNPC         | ASNVTNKT             | 543.9 | 5,138,800  |
| PKM2          | IVLTKSGRSRSHQVARY     | 595.0 | 3,119,200  | HSPD1          | GFEKISKGANPE         | 474.2 | 1,531,200  |
|               | GGKSIYGEKFEDE         | 523.9 | 35,131,000 | IFNGR1         | TVIKAPTSFGYDKP       | 687.4 | 2,965,600  |
|               | GGKSIYGEKFEDE         | 757.3 | 4,778,600  | IGHM           | RGKGYAATSQVLLPS      | 507.6 | 2,098,300  |
|               | GGKSIYGEKFEDE         | 728.8 | 2,774,400  |                | RGKGYAATSQVLLPSKD    | 515.6 | 16,501,000 |
| RPS12         | AEEGTAAGVMD           | 559.2 | 4,116,300  |                | EEVDGKADGAEAKPAE     | 596.7 | 3,620,000  |
| RPS3          | GLMIHSGD              | 414.2 | 4,026,400  | KARS           | AAVQAAEVKVD          | 549.8 | 937,560    |
| SLC16A3       | GGAVVDEGPTGVKAPD      | 733.9 | 672,040    | KONH3,4        | MHVAVFVGNVTAIQ       | 749.4 | 1,486,500  |
| SLC25A13      | AAAKVALTKRAD          | 404.6 | 8,729,200  | LAPT1M5        | NVRIATTALAIYH        | 480.6 | 1,226,300  |
| SLC25A5       | TDAAVSFAD             | 511.7 | 3,861,900  | LRP1           | LTPPLLLLL            | 495.8 | 833,660    |
| SSR1          | MRLLPRLLLLLL          | 788.0 | 584,300    | MAST1          | LLISLQLTNPLVRLG      | 434.0 | 476,290    |
| TFRC          | GGYVAYSKAATVTGK       | 735.9 | 4,492,100  | MX1            | VVSEVDIAKAD          | 572.3 | 5,701,600  |
| TOMM22        | AAAVAAGAGEPQSPD       | 690.8 | 1,203,200  | MYH10          | AQRTGLE              | 444.2 | 1,491,600  |
| TUBA1A,1B     | SVEGEGEEGEEY          | 720.8 | 2,237,200  |                | EEVDGKADGAEAKPAE     | 538.2 | 75,577,000 |
| UQCRH         | PEEEEEEEELVD          | 801.8 | 21,037,000 | MYH9           | GSDEEVDGKADGAEAKPAE  | 624.6 | 11,079,000 |
|               | GLEDEQKMLTESGD        | 775.3 | 9,333,800  |                | AQQAADKLYVD          | 691.8 | 4,143,100  |
| VAPA          | ASASGAMAKHEQILVLD     | 869.9 | 643,880    | NCL            | TPAKKTVTAKAVTTPG     | 555.7 | 1,912,900  |
| YBX1          | PPAENSSAPEAQGGAE      | 819.8 | 12,425,000 | NDUFB11        | PSKIQLEPEDE          | 577.3 | 3,471,300  |
| ZUFSP         | PFCKGIEEHSDEMETH      | 943.9 | 309,150    | NDUFV2         | GAGGALFVHRD          | 549.3 | 2,385,400  |
|               |                       |       |            | OTOF           | LRAQVKRHTVRDKLR      | 468.8 | 1,454,300  |
|               |                       |       |            | PBX1,2         | MRLDNMLLAEGVAGP      | 792.9 | 4,003,400  |
|               |                       |       |            | PGAM1,4        | VPQIKEGKRVLIAAHGN    | 609.7 | 6,500,800  |
|               |                       |       |            | PHB2           | ESFTRGSDSLIKGKK      | 550.6 | 3,225,800  |
|               |                       |       |            |                | IVLTKSGRSRSHQVARY    | 540.6 | 11,473,000 |
|               |                       |       |            | PKM2           | IVLTKSGRSRSHQVARYRPR | 548.6 | 9,241,800  |
|               |                       |       |            | PPIA           | GGKSIYGEKFEDE        | 523.9 | 17,408,000 |
|               |                       |       |            | RPL30          | PGDSDIIRSMPEQTGK     | 619.6 | 2,426,800  |
|               |                       |       |            | RPS19          | LDRIAGQVAANKKH       | 530.3 | 2,139,400  |
|               |                       |       |            | RPS3           | AVQISKRRKRVAD        | 496.3 | 20,504,000 |
|               |                       |       |            | RPS5           | TEWETAAPAVAETPD      | 793.4 | 727,340    |
|               |                       |       |            | RTF1           | GRAAAAAAVAVPLA       | 426.2 | 599,320    |
|               |                       |       |            | S100A10        | PSQMEHAMETMMF        | 784.3 | 2,049,500  |
|               |                       |       |            | SCN7A          | PSLVQLILLSRIIHML     | 922.6 | 2,452,100  |
|               |                       |       |            | SEMA7A         | GEMRGYAPFSPDENS      | 827.8 | 984,840    |
|               |                       |       |            | SERPINA5       | EMRGYAPFSPDEN        | 755.8 | 652,350    |
|               |                       |       |            | SLC25A13       | MQLFLLLCVLLVLSL      | 801.0 | 1,033,400  |
|               |                       |       |            | SLC25A5        | AAAKVALTKRAD         | 404.6 | 1,053,900  |
|               |                       |       |            | SLC9A8         | TDAAVSFAD            | 511.7 | 1,323,700  |
|               |                       |       |            |                | SPVTQILMQ            | 507.8 | 4,575,300  |
|               |                       |       |            |                | NPGGYVAYSKAATVTG     | 777.4 | 6,442,500  |
|               |                       |       |            |                | NPGGYVAYSKAATVTGK    | 561.0 | 3,412,400  |
|               |                       |       |            |                | GGYVAYSKAATVTG       | 671.8 | 3,309,000  |
|               |                       |       |            |                | NPGGYVAYSKAATVT      | 748.9 | 1,170,300  |
|               |                       |       |            |                | DSPSKSGEAQTTKDVFN    | 615.6 | 2,650,300  |
|               |                       |       |            |                | AAAVAAGAGEPQSPD      | 690.8 | 862,960    |
|               |                       |       |            |                | SVEGEGEEGEEY         | 720.8 | 3,664,700  |
|               |                       |       |            |                | ATAEBEEDFGEAEIEEA    | 941.9 | 2,416,500  |
|               |                       |       |            |                | GLEDEQKMLTESGD       | 775.3 | 5,436,300  |
|               |                       |       |            |                | ASASGAMAKHEQILVLD    | 869.9 | 1,950,400  |
|               |                       |       |            |                | PPAENSSAPEAQGGAE     | 819.8 | 23,961,000 |

**Supplementary Table 1** Repertoires of peptides eluted from endogenously expressing DP4/4 and DP5/17 EBV-LCL. Gene names and amino acid sequences of peptides isolated from DP4/4, homozygous for DP<sup>84GPM87</sup>, or DP5/17, homozygous for DP<sup>84DEAV87</sup>, EBV-LCL are shown in the first and second columns, respectively. The third column presents the m/z values of the peptides, and the fourth column the intensity of the peptides observed in LC/MS mode. Identified CLIP sequences are indicated in bold.

| Primates                                        | DP <sup>84Gly</sup> allele | DP <sup>84Asp</sup> allele |
|-------------------------------------------------|----------------------------|----------------------------|
| Crab-eating macaques ( <i>M. fascicularis</i> ) | –                          | +                          |
| Rhesus macaques ( <i>M. mulatta</i> )           | –                          | +                          |
| Bornean orangutans ( <i>P. pygmaeus</i> )       | –                          | +                          |
| Western gorillas ( <i>G. gorilla</i> )          | –                          | +                          |
| Bonobos ( <i>P. paniscus</i> )                  | –                          | +                          |
| Common chimpanzees ( <i>P. troglodytes</i> )    | +                          | +                          |
| Neanderthals ( <i>H. neanderthalensis</i> )     | +                          | +                          |
| Modern Humans ( <i>H. sapiens</i> )             | +                          | +                          |

**Supplementary Table 2** Search results for the presence or absence of DP<sup>84Gly</sup> and DP<sup>84Asp</sup> alleles in the genomes of crab-eating macaques (*M. fascicularis*), rhesus macaques (*M. mulatta*), bornean orangutans (*P. pygmaeus*), western gorillas (*G. gorilla*), bonobos (*P. paniscus*), common chimpanzees (*P. troglodytes*), neanderthals (*H. neanderthalensis*) and modern humans (*H. sapiens*).
